# Supplementary material for: Diagnosing Pulmonary Tuberculosis by Using Sequence-Specific Purification of Urine Cell-Free DNA
Source: PubMed Central journal article supplement (PMC8373247; doi:10.1128/jcm.00074-21), 2021-07-19
Supplement: jcm.00074-21-s0001.pdf [file jcm.00074-21-s0001.pdf]

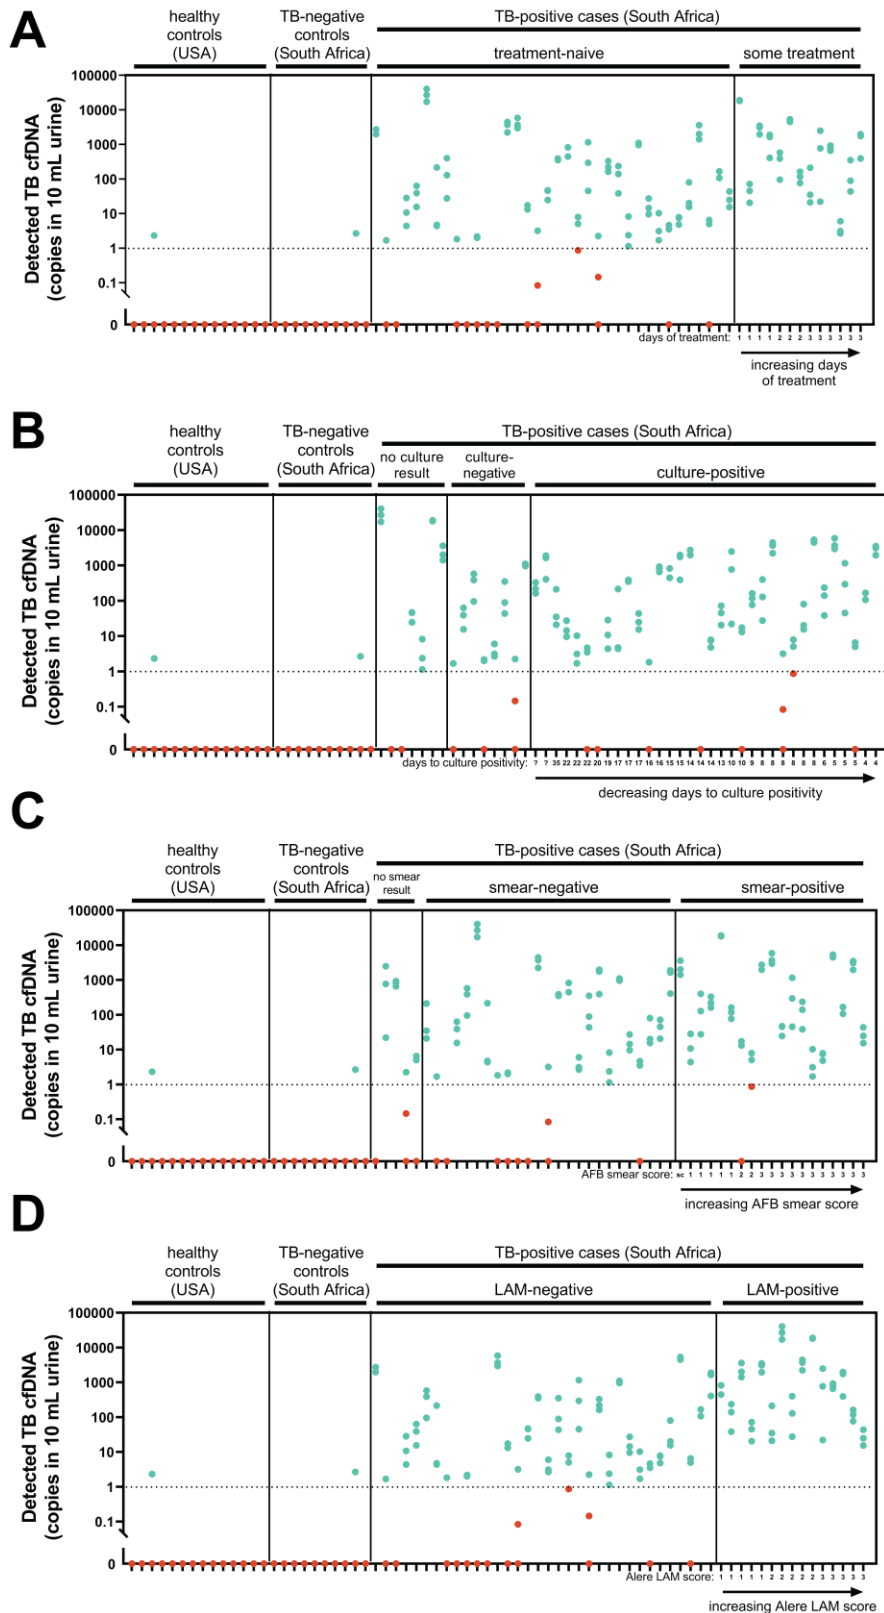

**Supplemental Fig. S1: Detected TB-specific urine cfDNA concentrations.** For all plots, each dot represents one of three replicates per sample, processed on different days. Cyan dots represent positive replicates with  $\geq 1$  copy detected and melting temperature matching the expected IS6110 amplicon. Red dots represent negative replicates. At least two out of three replicates were required to be positive for a sample to be called as positive. **(A)** Stratified by treatment status and ranked by days of treatment (no correlation). **(B)** Stratified by culture result and ranked by days to culture positivity (Spearman  $r = -0.36$  [95% CI:  $-0.64$  to  $-0.0060$ ],  $p = 0.041$ ). **(C)** Stratified by smear result and ranked by smear score (no correlation). **(D)** Stratified by Alere urine LAM result and ranked by Alere urine LAM score (no correlation).

**Supplemental Table S1: Comparison of sensitivities across groups.**

| Variable                | Groups for comparison of sensitivity | P-value <sup>a</sup> |
|-------------------------|--------------------------------------|----------------------|
| HIV status              | positive vs negative                 | 0.23                 |
| CD4 count <sup>b</sup>  | ≤200 vs >200 cells/mm <sup>3</sup>   | 0.60                 |
| TB treatment status     | treatment-naïve vs some treatment    | 0.090                |
| Sputum culture result   | positive vs negative                 | 0.32                 |
| AFB sputum smear result | positive vs negative                 | 0.029*               |
| Alere urine LAM result  | positive vs negative                 | 0.087                |
| Gender                  | female vs male                       | >0.99                |

\* Indicates P < 0.05

<sup>a</sup> P-values comparing sensitivity across groups were calculated using Fisher's exact test for relative risk ratios.

<sup>b</sup> CD4 count was measured for HIV-positive patients only.

**Supplemental Table S2: Diagnostic odds ratios indicating associations with a positive urine cfDNA result.**

| Variable                | Comparison                         | Odds ratio (95% CI) <sup>a</sup> | P-value <sup>b</sup> |
|-------------------------|------------------------------------|----------------------------------|----------------------|
| HIV status              | positive vs negative               | 2.7 (0.68 – 10.5)                | 0.23                 |
| CD4 count <sup>c</sup>  | ≤200 vs >200 cells/mm <sup>3</sup> | 2.0 (0.28 – 13.9)                | 0.60                 |
| TB treatment status     | treatment-naïve vs some treatment  | infinity (0.79 – infinity)       | 0.090                |
| Sputum culture result   | positive vs negative               | 2.5 (0.39 – 14.7)                | 0.32                 |
| AFB sputum smear result | positive vs negative               | infinity (1.6 – infinity)        | 0.029*               |
| Alere urine LAM result  | positive vs negative               | infinity (1.0 – infinity)        | 0.087                |

\* Indicates P < 0.05

<sup>a</sup> Diagnostic odds ratio of >1 indicates variables associated with higher likelihood of a positive cfDNA result. 95% confidence intervals calculated using the Baptista-Pike method.

<sup>b</sup> Diagnostic odds ratios were compared to a value of 1 using Fisher's exact test.

<sup>c</sup> CD4 count was measured for HIV-positive patients only.

**Supplemental Table S3: Correlations with detected TB-specific cfDNA concentration.**

| Variable                            | Spearman's rank correlation coefficient (95% CI) | P-value |
|-------------------------------------|--------------------------------------------------|---------|
| CD4 count <sup>a</sup>              | -0.43 (-0.68 to -0.10)                           | 0.011*  |
| Days of TB treatment <sup>b</sup>   | -0.36 (-0.77 to 0.26)                            | 0.23    |
| Days to sputum culture positivity   | -0.36 (-0.64 to -0.0060)                         | 0.041*  |
| AFB sputum smear score <sup>c</sup> | -0.37 (-0.77 to 0.24)                            | 0.21    |
| Alere urine LAM score <sup>d</sup>  | -0.094 (-0.59 to 0.45)                           | 0.76    |

\* Indicates P < 0.05

<sup>a</sup> CD4 count was measured for HIV-positive patients only.

<sup>b</sup> Correlation calculated only for patients with some treatment (1 – 3 days). Treatment-naïve patients were excluded.

<sup>c</sup> Correlation calculated only for smear-positive patients (AFB score ≥1). Smear-negative patients were excluded.

<sup>d</sup> Correlation calculated only for LAM-positive patients (Alere LAM score ≥1). LAM-negative patients were excluded.

**Supplemental Table S4: Comparison of detected TB-specific cfDNA concentration across groups.**

| Variable                | Groups for comparison of detected cfDNA concentration | P-value <sup>a</sup> |
|-------------------------|-------------------------------------------------------|----------------------|
| HIV status              | positive vs negative                                  | 0.8007               |
| CD4 count <sup>b</sup>  | ≤200 vs >200 cells/mm <sup>3</sup>                    | 0.1946               |
| TB treatment status     | treatment-naïve vs some treatment                     | 0.0447*              |
| Sputum culture result   | positive vs negative                                  | 0.3709               |
| AFB sputum smear result | positive vs negative                                  | 0.7013               |
| Alere urine LAM result  | positive vs negative                                  | 0.0045**             |
| Gender                  | female vs male                                        | 0.1081               |

\* Indicates P < 0.05; \*\* Indicates P < 0.01

<sup>a</sup> P-values calculated using Mann-Whitney test comparing sample means of cfDNA-positive samples.

<sup>b</sup> CD4 count was measured for HIV-positive patients only.
